# Supplementary material
Source: PubMed Central journal article supplement (PMC4135472)
Supplement: NIHMS594795-supplement-Supplementary_Materials.pdf [file NIHMS594795-supplement-Supplementary_Materials.pdf]

# Supplementary material for “Convergence of Sample Eigenvalues, Eigenvectors, and Principal Component Scores for Ultra-High Dimensional Data”

BY SEUNGGEUN LEE

*Department of Biostatistics, University of Michigan, 1415 Washington Heights,  
 Ann Arbor, Michigan 48109, U.S.A.*  
 leeshawn@umich.edu

5

FEI ZOU

*Department of Biostatistics, University of North Carolina, 135 Dauer Drive,  
 Chapel Hill, North Carolina 27599, U.S.A.*  
 fzou@bios.unc.edu

10

FRED A. WRIGHT

*Bioinformatics Research Center, North Carolina State University, 1 Lampe Drive,  
 Raleigh, North Carolina 27607, U.S.A.*  
 fred\_wright@ncsu.edu

15

## 1. SPHERICITY CONDITIONS OF NON-SPIKED EIGENVALUES

Since eigenvalues can be rescaled by a constant, we assume that  $\bar{\lambda} = 1$ . Condition 1 is closely related to the sphericity measure in John (1971, 1972) and the  $\epsilon_m$  condition of Jung & Marron (2009). Under the high dimension low sample size regime, Jung & Marron (2009) defined

$$\epsilon_m = \left( \sum_{v=m+1}^p \lambda_v \right)^2 \left( p \sum_{v=m+1}^p \lambda_v^2 \right)^{-1},$$

and derived their asymptotic results under the condition where  $\epsilon_m^{-1} = o(p)$ . Since under Condition 1,

$$\begin{aligned} \epsilon_m^{-1} &= \left( p \sum_{v=m+1}^p \lambda_v^2 \right) \left( \sum_{v=m+1}^p \lambda_v \right)^{-2} = (p-m)^{-2} \sum_{v=m+1}^p p(\lambda_v - 1)^2 + (p-m)^{-1}p \\ &= o(p) \quad \text{for fixed } n, \end{aligned}$$

Condition 1 implies the  $\epsilon_m$  condition. The relative growth rate of  $n$  to  $p$  plays a critical role in both conditions. For example, when  $(p-m)^{-1} \sum_{v=m+1}^p (\lambda_v - 1)^2 = O(1)$ ,  $p$  must grow faster than  $n^2$  to satisfy Condition 1. In Condition 2, we relax the assumption on  $(\lambda_v - 1)^2$  but add an additional assumption on  $(\lambda_v - 1)^4$ .

20

## 2. NOTATIONS

Since  $E_p \Lambda^{1/2} Z Z^T \Lambda^{1/2} E_p^T$  has the same eigenvalues as  $\Lambda^{1/2} Z Z^T \Lambda^{1/2}$ , with  $E_p^T U$  being the corresponding eigenvector matrix, without loss of generality we assume that  $\sigma^2 \Lambda$  is the population covariance matrix, and  $e_v$  is the  $v$ th eigenvector. Let  $\varphi_v(\cdot)$  be a function on a matrix that returns its  $v$ th largest eigenvalue. Suppose suffixes  $A$  and  $B$  represent the first  $m$  and the remaining coordinates of any given matrix, respectively. The sample covariance matrix  $S$  can then be partitioned as

$$S = \begin{pmatrix} S_{AA} & S_{AB} \\ S_{BA} & S_{BB} \end{pmatrix},$$

and  $u_v^T$  and  $Z^T$  can be partitioned as  $(u_{A,v}^T, u_{B,v}^T)$  and  $(Z_A^T, Z_B^T)$ , respectively. Let  $\Lambda_A = \text{diag}(\lambda_1, \dots, \lambda_m)$ ,  $\Lambda_B = \text{diag}(\lambda_{m+1}, \dots, \lambda_p)$ ,  $R_v = \|u_{B,v}\|$ , and  $a_v = (1 - R_v^2)^{-1/2} u_{A,v}$ . By the singular value decomposition,  $\Lambda_B^{1/2} Z_B = n^{-1/2} V M^{1/2} H^T$ , where  $M = \text{diag}(\mu_1, \dots, \mu_{p-m})$  is a  $(p-m) \times (p-m)$  diagonal matrix of the ordered eigenvalues of  $S_{BB}$ ,  $V$  is a  $(p-m) \times (p-m)$  orthogonal matrix, and  $H$  is an  $n \times (p-m)$  matrix. When  $n \geq p-m$ ,  $H$  is column-orthogonal. When  $n < p-m$ , the first  $n$  columns of  $H$  are orthogonal while the rest of the columns are zero. Let  $f_v = \lambda_{v+m} - 1$ , we then have

$$\begin{aligned} \sum_{i \neq j \neq k \neq l} f_i f_j f_k f_l &= 3 \sum_{i \neq j} f_i^2 f_j^2 - 3 \sum_i f_i^4, & \sum_{i \neq j \neq k} f_i^2 f_j f_k &= - \sum_{i \neq j} f_i^2 f_j^2 + \sum_i f_i^4, \\ \sum_{i \neq j} f_i^3 f_j &= - \sum_i f_i^4, & \sum_{i \neq j \neq k} f_i f_j f_k &= 2 \sum_i f_i^3, & \sum_{i \neq j} f_i^2 f_j &= - \sum_i f_i^3, \\ \sum_{i \neq j} f_i f_j &= - \sum_i f_i^2. \end{aligned} \tag{1}$$

## 3. PROOF OF THEOREM 1

## 3.1. Lemma 1

We introduce the following lemma for future use.

LEMMA 1. Suppose  $\gamma_p \rightarrow \infty$  and  $n \rightarrow \infty$  as  $p \rightarrow \infty$ . With either Condition 1 or 2,

$$p^{-1} \|Z_B^T Z_B - Z_B^T \Lambda_B Z_B\| \rightarrow 0 \text{ in probability.}$$

*Proof.* Step 1. We first truncate and centralize  $z_{ij}$ , as described in Yin et al. (1988) and Bai & Yin (1993). Define a  $(p-m) \times n$  matrix  $\tilde{Z}$  with the  $(i, j)$ th element

$$\tilde{z}_{ij} = z_{ij}^B I(|z_{ij}^B| \leq \sigma \delta_p n^{1/4} p^{1/4}) - E \left\{ z_{ij}^B I(|z_{ij}^B| \leq \sigma \delta_p n^{1/4} p^{1/4}) \right\},$$

where  $z_{ij}^B$  is the  $(i, j)$ th element of  $Z_B$ . By the truncation and centralization lemma (Yin et al., 1988), there exists a sequence  $\delta_p$  that converges to zero and satisfies

$$\begin{aligned} E(\tilde{z}_{ij}) &= 0, & E(\tilde{z}_{ij}^2) &\rightarrow \sigma^2, & E(\tilde{z}_{ij}^4) &= O(1), & E(\tilde{z}_{ij}^k) &= (\delta_p n^{1/4} p^{1/4})^{k-4} O(1) \quad (k > 4), \\ \varphi_1(p^{-1} \tilde{Z}^T \tilde{Z}) - \varphi_1(p^{-1} Z_B^T Z_B) &= o(1), & \varphi_n(p^{-1} \tilde{Z}^T \tilde{Z}) - \varphi_n(p^{-1} Z_B^T Z_B) &= o(1). \end{aligned} \tag{2}$$

Since both  $\varphi_1(p^{-1} Z_B^T Z_B)$  and  $\varphi_n(p^{-1} Z_B^T Z_B)$  converge to unity,  $p^{-1} \|\tilde{Z}^T \tilde{Z} - Z_B^T Z_B\| = o(1)$ .

Step 2. We largely follow the combinatorial argument described in Bai & Silverstein (2010). Suppose there are two sets of integers,  $\xi = (\xi_1, \dots, \xi_{k+1})$  with  $\xi_1 = \xi_{k+1}$  and  $\zeta = (\zeta_1, \dots, \zeta_k)$ ,

where the  $\xi_u$ s range from 1 to  $n$  and the  $\zeta_u$ s range from 1 to  $p - m$ . A graph  $G(\xi, \zeta)$  is constructed by connecting  $k$  edges from  $\xi_u$  to  $\zeta_u$  and another  $k$  edges from  $\zeta_u$  to  $\xi_{u+1}$ . See Figure 3.1 of Bai & Silverstein (2010). An edge is single if there are no other edges to share the same two vertices. For the graph  $G(\xi, \zeta)$ , let  $\tilde{Z}_{G(\xi, \zeta)} = \prod_{u=1}^k \tilde{z}_{\xi_u, \zeta_u} \tilde{z}_{\xi_{u+1}, \zeta_u}$ . Two graphs are isomorphic if there exist a permutation of  $\xi$  and a permutation of  $\zeta$  such that the graphs are identical. The canonical graph for each isomorphic group is defined as  $\xi_1 = \zeta_1 = 1, \xi_u \leq \max(\xi_1, \dots, \xi_{u-1}) + 1$ , and  $\zeta_u \leq \max(\zeta_1, \dots, \zeta_{u-1}) + 1$ . Let  $r + 1$  and  $s$  be the number of distinct elements in  $\xi$  and  $\zeta$ , respectively. Let  $A_n = p^{-1} \tilde{Z}^T (\Lambda_B - I) \tilde{Z}$  and  $\Delta(k, r, s)$  be a set of canonical graphs with no single edge. It can be shown that

$$E \left\{ \text{tr}(A_n^k) \right\} = p^{-k} \sum_{r=0}^{k-1} \prod_{n_1=n-r}^n n_1 \sum_{s=1}^{k-r} \sum_{j_1 \neq \dots \neq j_s} \sum_{m_{s,1}, \dots, m_{s,s}} \prod_{i=1}^s f_{j_i}^{m_{s,i}} \sum_{G \in \Delta(k, r, s)} E(\tilde{Z}_G),$$

where  $m_{s,1} \geq \dots \geq m_{s,s} \geq 1$  and  $\sum_{i=1}^s m_{s,i} = k$ .

*Step 3.* Since  $E(\tilde{Z}_G) = O(1)$  for all  $G \in \Delta(2, r, s)$ ,

$$\begin{aligned} E \left\{ \text{tr}(A_n^2) \right\} &= p^{-2n} \sum_{j_1 \neq j_2} f_{j_1} f_{j_2} O(1) + p^{-2n} \sum_{j_1} f_{j_1}^2 O(1) + p^{-2n} n(n-1) \sum_{j_1} f_{j_1}^2 O(1) \\ &= p^{-2n} n(n-1) \sum_{j_1} f_{j_1}^2 O(1) = o(1), \end{aligned} \quad (3)$$

under Condition 1. Applying Markov's inequality, for any  $\epsilon > 0$ ,

$$\text{pr} \left\{ \max_{v=1, \dots, n} \varphi_v(A_n^2) > \epsilon \right\} \leq \text{pr} \left\{ \text{tr}(A_n^2) > \epsilon \right\} \leq \epsilon^{-1} E \left\{ \text{tr}(A_n^2) \right\} = o(1),$$

indicating that  $\|A_n\| = o_p(1)$ . Thus, Lemma 1 holds under Condition 1. Using the same approach in (3) with (1)–(2), it can be shown that

$$E \left\{ \text{tr}(A_n^4) \right\} = (n^3 + n^{3/2} p^{1/2}) p^{-4} \sum_{j_1 \neq j_2} f_{j_1}^2 f_{j_2}^2 O(1) + (n^4 + n^2 p) p^{-4} \sum_{j_1} f_{j_1}^4 O(1),$$

which converges to zero under Condition 2. Therefore,  $\|A_n\| = o_p(1)$ , which concludes the proof.

### 3.2. Convergence of sample eigenvalues

We first assume that  $c_v$  ( $v \leq m$ ) is bounded away from zero. The  $v$ th eigenvalue of  $S$  is  $d_v = \varphi_v(n^{-1} Z_A^T \Lambda_A Z_A + n^{-1} Z_B^T \Lambda_B Z_B)$ . Since  $\|\lambda_v^{-1} \Lambda_A\| = O(1)$  ( $v \leq m$ ), and  $n^{-1} Z_A Z_A^T - \sigma^2 I = o(1)$ , we can obtain

$$\left\| (n \lambda_v)^{-1} \Lambda_A^{1/2} Z_A Z_A^T \Lambda_A^{1/2} - \lambda_v^{-1} \sigma^2 \Lambda_A \right\| = o(1).$$

By the continuity of eigenvalues and Lemma 1,  $\lambda_v^{-1} \varphi_v(n^{-1} Z_A^T \Lambda_A Z_A) - \sigma^2 = o(1)$  ( $v \leq m$ ), and  $\gamma_p^{-1} \varphi_v(n^{-1} Z_B^T \Lambda_B Z_B) - \sigma^2 = o_p(1)$  ( $v > m$ ). For  $v > m$ ,  $\varphi_v(n^{-1} Z_A^T \Lambda_A Z_A) = 0$ , since  $Z_A^T \Lambda_A Z_A$  has rank  $m$ . Further, by Weyl's inequality (Bhatia, 1997),  $\varphi_v(S) \leq \varphi_v(n^{-1} Z_A^T \Lambda_A Z_A) + \varphi_1(n^{-1} Z_B^T \Lambda_B Z_B)$  and  $\varphi_v(S) \geq \varphi_v(n^{-1} Z_A^T \Lambda_A Z_A) + \varphi_n(n^{-1} Z_B^T \Lambda_B Z_B)$ .

4

Hence,

$$\begin{aligned} d_v/\lambda_v - \sigma^2 c_v^{-1}(c_v + 1) &= o_p(1) \quad (v \leq m), \\ d_v/\gamma_p - \sigma^2 &= o_p(1) \quad (v > m). \end{aligned}$$

When  $c_v = o(1)$ ,  $\gamma_p^{-1} \lambda_1(n^{-1} Z_A^T \Lambda_A Z_A) \rightarrow 0$ . Hence,  $d_v \gamma_p^{-1} = \sigma^2 + o_p(1)$ , which concludes the proof.

### 3.3. Convergence of sample eigenvectors

The proof largely follows the arguments in Paul (2007) and Lee et al. (2010). We assume without loss of generality that  $\sigma^2$  is unity. From the definitions of eigenvalues and eigenvectors,

$$\begin{aligned} &\{S_{AA} + S_{AB}(d_v I - S_{BB})^{-1} S_{BA}\} a_v \\ &= \left\{ S_{AA} + n^{-1} \Lambda_A^{1/2} Z_A H M (d_v I - M)^{-1} H^T Z_A^T \Lambda_A^{1/2} \right\} a_v = d_v a_v, \end{aligned} \quad (4)$$

and

$$a_v^T \left\{ I + n^{-1} \Lambda_A^{1/2} Z_A H M (d_v I - M)^{-2} H^T Z_A^T \Lambda_A^{1/2} \right\} a_v = (1 - R_v^2)^{-1}. \quad (5)$$

We first assume that  $c_v$  ( $v \leq m$ ) is bounded away from zero. Let

$$\eta_v = c_v^{-1}(c_v + 1), \quad \mathcal{R}_v = \sum_{k \neq v} \{\eta_v(\lambda_k - \lambda_v)\}^{-1} \lambda_v e_{A,k} e_{A,k}^T,$$

$$\mathcal{D}_v = \lambda_v^{-1} \{S_{AA} + S_{AB}(d_v I - S_{BB})^{-1} S_{BA} - \eta_v \Lambda_A\},$$

where  $e_{A,v}$  contains the first  $m$  elements of  $e_v$ . From (4), it can be shown that

$$(\lambda_v^{-1} \eta_v \Lambda_A - \eta_v I) a_v = -\mathcal{D}_v a_v + (\lambda_v^{-1} d_v - \eta_v) a_v.$$

Since  $\mathcal{R}_v (\lambda_v^{-1} \eta_v \Lambda_A - \eta_v I) = I - e_{A,v} e_{A,v}^T$ ,

$$(I - e_{A,v} e_{A,v}^T) a_v = -\mathcal{R}_v \mathcal{D}_v a_v + (\lambda_v^{-1} d_v - \eta_v) \mathcal{R}_v a_v,$$

which indicates that  $a_v - e_v = o_p(1)$  if both  $\|\mathcal{R}_v \mathcal{D}_v\|$  and  $|\lambda_v^{-1} d_v - \eta_v| \|\mathcal{R}_v\|$  are  $o_p(1)$ . For  $k = 1, \dots, m$  and  $l = 1, \dots, m$ , we show that

$$\begin{aligned} e_{A,k}^T \mathcal{D}_v e_{A,l} &= \lambda_v^{-1} e_{A,k}^T S_{AA} e_{A,l} \\ &+ \lambda_v^{-1} e_{A,k}^T S_{AB} (d_v I - S_{BB})^{-1} S_{BA} e_{A,l} - \lambda_v^{-1} \eta_v e_{A,k}^T \Lambda_A e_{A,l}. \end{aligned} \quad (6)$$

The first term of (6) is

$$\lambda_v^{-1} e_{A,k}^T S_{AA} e_{A,l} = (n \lambda_v)^{-1} (\lambda_k \lambda_l)^{1/2} Z_{A,k}^T Z_{A,l} = \begin{cases} \lambda_v^{-1} (\lambda_k \lambda_l)^{1/2} o_p(1), & k \neq l, \\ \lambda_v^{-1} \lambda_k \{1 + o_p(1)\}, & k = l, \end{cases} \quad (7)$$

and the third term of (6) equals

$$\begin{cases} 0, & k \neq l, \\ \lambda_v^{-1} \eta_v \lambda_k, & k = l. \end{cases} \quad (8)$$

From Proposition 1 of Lee et al. (2010),

$$n^{-1} Z_{A,k}^T H M (d_v I - M)^{-1} H^T Z_{A,l} = \begin{cases} o_p(1), & l \neq k, \\ n^{-1} \text{tr} \{M (d_v I - M)^{-1}\} + o_p(1), & l = k. \end{cases}$$

Although Proposition 1 of Lee et al. (2010) requires that  $\|HM(d_v I - M)^{-1}H^T\| = O(1)$ , it can easily be shown that the same result holds for  $\|HM(d_v I - M)^{-1}H^T\| = O(1) + o_p(1)$ . Since  $\mu_n(d_v - \mu_n)^{-1} < n^{-1}\text{tr}\{M(d_v I - M)^{-1}\} < \mu_1(d_v - \mu_1)^{-1}$ , and both  $\mu_1\gamma_p^{-1}$  and  $\mu_n\gamma_p^{-1}$  are  $1 + o_p(1)$ ,

$$n^{-1}\text{tr}\{M(d_v I - M)^{-1}\} = \{1 + o_p(1)\} \{c_v + c_v o_p(1)\}^{-1} + o_p(1). \quad (9)$$

Hence, the second term of (6) equals

$$\begin{cases} \lambda_v^{-1}(\lambda_k \lambda_l)^{1/2} o_p(1), & k \neq l, \\ \lambda_v^{-1} \lambda_k \left[ \{1 + o_p(1)\} \{c_v + c_v o_p(1)\}^{-1} + o_p(1) \right], & k = l. \end{cases} \quad (10)$$

Summing up (7), (8), and (10), we get

$$e_{A,k}^T \mathcal{D}_v e_{A,l} = \lambda_v^{-1}(\lambda_k \lambda_l)^{1/2} o_p(1) \quad (k = 1, \dots, m; l = 1, \dots, m).$$

Decomposing  $\mathcal{R}_v \mathcal{D}_v e_{A,l} = \sum_{k \neq v} \lambda_v \{\eta_v(\lambda_k - \lambda_v)\}^{-1} e_{A,k} e_{A,k}^T \mathcal{D}_v e_{A,l}$ , we conclude that  $\|\mathcal{R}_v \mathcal{D}_v\| = o_p(1)$ . Since  $\|\mathcal{R}_v\| = O(1)$  and  $|d_v \lambda_v^{-1} - \eta_v| \|\mathcal{R}_v\| = o_p(1)$ ,

$$a_v - e_v = o_p(1). \quad (11)$$

From the same argument of (9),

$$n^{-1} \lambda_v Z_{Av}^T HM(d_v I - M)^{-2} H^T Z_{Av} = \frac{1 + o_p(1)}{c_v + c_v o_p(1)} + o_p(1) = c_v^{-1} + o_p(1).$$

Using (11),

$$\begin{aligned} (5) &= \{e_v + o_p(1)\}^T \left\{ I + n^{-1} \Lambda_A^{1/2} Z_A HM(d_v I - M)^{-2} H^T Z_A^T \Lambda_A^{1/2} \right\} \{e_v + o_p(1)\} \\ &= 1 + c_v^{-1} + o_p(1). \end{aligned} \quad (12) \quad 95$$

By combining (11) and (12),

$$\langle e_v, u_v \rangle = \langle e_{A,v}, a_v \rangle (1 - R_v^2)^{1/2} = c_v^{1/2} (1 + c_v)^{-1/2} + o_p(1), \quad (13)$$

which completes the proof for the case where  $c_v$  is bounded away from zero.

Now we assume  $c_v = o(1)$ . Without loss of generality, we only consider the first eigenvector. Since  $e_1^T u_1 < (1 - R_1^2)^{1/2}$ , all we need to show is that  $R_1 \rightarrow 1$ . The first sample eigenvalue is

$$d_1 = u_1^T S u_1 = u_{A,1}^T S_{AA} u_{A,1} + 2u_{A,1}^T S_{AB} u_{B,1} + u_{B,1}^T S_{BB} u_{B,1}. \quad (14) \quad 100$$

The first term of (14) is

$$\begin{aligned} u_{A,1}^T S_{AA} u_{A,1} &= n^{-1} u_{A,1}^T \Lambda_A^{1/2} Z_A Z_A^T \Lambda_A^{1/2} u_{A,1} \\ &\leq (1 - R_1^2) \varphi_1(n^{-1} \Lambda_A^{1/2} Z_A Z_A^T \Lambda_A^{1/2}) = (1 - R_1^2) \lambda_1 \{1 + o(1)\}, \end{aligned}$$

and the second term of (14) is

$$\begin{aligned}
105 \quad u_{A,1}^T S_{AB} u_{B,1} &\leq \lambda_1^{1/2} \|u_{A,1}\| \max_{v=1,\dots,m} \left( n^{-1} z_{A,v}^T Z_B^T \Lambda_B^{1/2} u_{B,1} \right) \\
&\leq R_1 \lambda_1^{1/2} (1 - R_1^2)^{1/2} \max_{v=1,\dots,m} \left( n^{-1} \|\Lambda_B^{1/2} Z_B z_{A,v}\| \right) \\
&\leq R_1 \lambda_1^{1/2} (1 - R_1^2)^{1/2} n^{-1} \left( \sum_{v=1}^m z_{A,v}^T Z_B^T \Lambda_B Z_B z_{A,v} \right)^{1/2} \\
&= R_1 \gamma_p \{c_1(1 - R_1^2)\}^{1/2} O_p(1),
\end{aligned}$$

110 where  $z_{A,v}$  is the  $v$ th row vector of  $Z_A$ , and the second inequality is obtained by the Cauchy-Schwarz inequality. The third term of (14) is  $u_{B,1}^T S_{BB} u_{B,1} < R_1^2 \mu_1$ . Combining all the three terms, we get  $(d_1 - \mu_1) \gamma_p^{-1} \leq R_1^2 - 1 + o_p(1)$ . Since  $d_1 - \mu_1 \geq 0$  by the interlacing inequality (Horn & Johnson, 1990), we conclude that  $R_1 \rightarrow 1$ , which completes the proof.

#### 4. PROOF OF COROLLARY 1

115 Since  $\lambda_v/\gamma_p^\alpha$  converges to  $\tilde{c}_v$  as  $p \rightarrow \infty$ ,  $c_v$  converges to  $\infty$ ,  $\tilde{c}_v$ , and 0 for  $\alpha > 1$ ,  $\alpha = 1$ , and  $\alpha < 1$ , respectively, as  $p \rightarrow \infty$ , the results in Corollary 1 can be easily obtained.

#### 5. PROOF OF THEOREM 2

##### 5.1. Convergence of sample principal component scores

Without loss of generality, we assume  $\text{corr}(p_v, \hat{p}_v) \geq 0$ . Let  $\bar{p}_v$  and  $\bar{p}_v^*$  be the averages of elements in  $p_v$  and  $\hat{p}_v$ , respectively. From  $S_{AA} u_{A,v} + S_{AB} u_{B,v} = d_v u_{A,v}$ , we obtain

$$\begin{aligned}
120 \quad \frac{p_v^T \hat{p}_v}{n(\sigma^2 \lambda_v d_v)^{1/2}} &= \frac{1}{(\sigma^2 \lambda_v d_v)^{1/2}} e_{A,v}^T S_{AA} u_{A,v} + \frac{1}{(\sigma^2 \lambda_v d_v)^{1/2}} e_{A,v}^T S_{AB} u_{B,v} \\
&= \frac{d_v^{1/2}}{\sigma \lambda_v^{1/2}} e_{A,v}^T u_{A,v} = \frac{d_v^{1/2}}{\sigma \lambda_v^{1/2}} e_v^T u_v. \tag{15}
\end{aligned}$$

Since  $e_v^T u_v - \{c_v(c_v + 1)^{-1}\}^{1/2} = o_p(1)$  and  $\lambda_v^{-1} d_v - \sigma^2 c_v^{-1} (c_v + 1) = o_p(1)$ , (15) converges to unity in probability, and  $n^{-1/2} J^T \{p_v(\sigma^2 \lambda_v)^{-1/2} - \hat{p}_v d_v^{-1/2}\} = o_p(1)$  where  $J = (1, \dots, 1)^T$ . Thus,

$$\begin{aligned}
125 \quad \frac{\bar{p}_v J^T \hat{p}_v}{n(\sigma^2 \lambda_v d_v)^{1/2}} &= \frac{\bar{p}_v J^T \left\{ p_v(\sigma^2 \lambda_v)^{-1/2} - p_v(\sigma^2 \lambda_v)^{-1/2} + \hat{p}_v d_v^{-1/2} \right\}}{n(\sigma^2 \lambda_v)^{1/2}} \\
&= \frac{\bar{p}_v^2}{\sigma^2 \lambda_v} - \frac{\bar{p}_v J^T \left\{ p_v(\sigma^2 \lambda_v)^{-1/2} - \hat{p}_v d_v^{-1/2} \right\}}{n(\sigma^2 \lambda_v)^{1/2}} = o_p(1). \tag{16}
\end{aligned}$$

Since  $(p_v - \bar{p}_v J)^T (p_v - \bar{p}_v J) / (n\sigma^2 \lambda_v) = 1 + o_p(1)$ , we can easily show that  $(\hat{p}_v - \bar{p}_v^* J)^T (\hat{p}_v - \bar{p}_v^* J) / (n d_v) = 1 + o_p(1)$ . Combining (15) and (16), we conclude the proof.

### 5.2. Convergence of predicted principal component scores

Let  $u_v^\perp = (I - e_v e_v^T)u_v \{1 - (u_v^T e_v)^2\}^{-1/2}$ . Then  $u_v = (u_v^T e_v)e_v + \{1 - (u_v^T e_v)^2\}^{1/2} u_v^\perp$ .  
We partition  $u_v^\perp$  into  $(u_{A,v}^\perp, u_{B,v}^\perp)$ . Following the same argument in Lee et al. (2010),

$$\lambda_v^{-1} E(\hat{p}_{vj}^2) = \lambda_v^{-1} E(d_v) \rightarrow \sigma^2 c_v^{-1} (c_v + 1), \quad (17)$$

and

$$\begin{aligned} \lambda_v^{-1} E(\hat{q}_v^2 | u_v) &= (u_v^T e_v)^2 + \lambda_v^{-1} \{1 - (u_v^T e_v)^2\} (u_{A,v}^{\perp T} \Lambda_A u_{A,v}^\perp + u_{B,v}^{\perp T} u_{B,v}^\perp) \\ &\quad + 2\lambda_v^{-1} u_v^T e_v \{1 - (u_v^T e_v)^2\}^{1/2} e_{A,v} \Lambda_A u_{A,v}^\perp \\ &\rightarrow \sigma^2 c_v (1 + c_v)^{-1} \text{ in probability.} \end{aligned} \quad (18)$$

The proof follows from (17) and (18).

## 6. EXAMPLES

*Example 1.* Suppose there are two independent groups of variables, one with  $p_1$  variables and the other with  $p_2$  variables, and the covariance structure is block compound symmetric. That is, the population covariance matrix is

$$\Sigma = \left\{ \begin{array}{cc} (1 - \rho_1)I_{p_1, p_1} & 0 \\ 0 & (1 - \rho_2)I_{p_2, p_2} \end{array} \right\} + \begin{pmatrix} \rho_1 J_{p_1} J_{p_1}^T & 0 \\ 0 & \rho_2 J_{p_2} J_{p_2}^T \end{pmatrix},$$

where  $p = p_1 + p_2$ ,  $I_{p,p}$  is a  $p \times p$  identity matrix, and  $J_p$  is a  $p \times 1$  vector with all elements equal to unity. Define  $r_k = (p_k - 1)/(p - 2)$  ( $k = 1, 2$ ). Suppose the  $r_k$ s are bounded away from 0,  $(p_1 - 1)\rho_1 \geq (p_2 - 1)\rho_2$ , and  $(p_1 - 1)\rho_1 \asymp (p_2 - 1)\rho_2$ . Then the first two population eigenvalues, after rescaling, equal

$$\lambda_k = \frac{1 + (p_k - 1)\rho_k}{C} \approx \frac{r_k \rho_k}{C} p \quad (k \leq 2),$$

where  $C = 1 - r_1 \rho_1 - r_2 \rho_2$ . The non-spiked eigenvalues are

$$\frac{1}{C} \underbrace{(1 - \rho_1, \dots, 1 - \rho_1)}_{p_1 - 1}, \underbrace{(1 - \rho_2, \dots, 1 - \rho_2)}_{p_2 - 1}.$$

When  $\rho_1 \neq \rho_2$ , the non-spiked eigenvalues are not identical, but Condition 1 holds if  $p \gg n^2$ . Now let us consider 3 scenarios for the  $\rho_k$ s: large ( $\rho_k \gg 1/n$ ), small ( $\rho_k \asymp 1/n$ ), and very small ( $\rho_k \ll 1/n$ ). From Theorem 1, the first two sample eigenvalues are consistent for large  $\rho_k$ s, inconsistent but separable from the bulk for small  $\rho_k$ s, and indistinguishable for very small  $\rho_k$ s. Similarly, the first two sample eigenvectors are consistent for large  $\rho_k$ s, neither consistent nor asymptotically perpendicular to the corresponding population eigenvectors for small  $\rho_k$ s, and asymptotically perpendicular for very small  $\rho_k$ s.

*Example 2.* Suppose there is a group of variables with a compound symmetric correlation structure and another group of independent variables. Specifically, the population covariance matrix is

$$\Sigma = \left\{ \begin{array}{cc} (1 - \rho)I_{p_1, p_1} & 0 \\ 0 & I_{p_2, p_2} \end{array} \right\} + \begin{pmatrix} \rho J_{p_1} J_{p_1}^T & 0 \\ 0 & 0 \end{pmatrix}.$$

The first population eigenvalue, after rescaling, is

$$\lambda_1 = \frac{1 + (p_1 - 1)\rho}{C} \asymp \frac{\rho p_1}{C},$$

where  $C = 1 - r_1\rho$  and  $r_1 = (p_1 - 1)/(p - 1)$ . The non-spiked eigenvalues are

$$\frac{1}{C}(\underbrace{1, \dots, 1}_{p_2}, \underbrace{1 - \rho, \dots, 1 - \rho}_{p_1 - 1}).$$

We consider three scenarios on the sizes of the groups: large ( $p_1 \asymp p$ ), moderate ( $p_1 \asymp p/n$ ) and small ( $p_1 \ll p/n$ ). From Theorem 1, the first eigenvalue is consistent for large  $p_1$ , inconsistent but separable from the bulk for moderate  $p_1$ , and indistinguishable for small  $p_1$ . The behaviors of sample eigenvectors can also be inferred from Theorem 1.



## REFERENCES

- BAI, Z. & SILVERSTEIN, J. (2010). *Spectral Analysis of Large Dimensional Random Matrices*. Springer Verlag.
- BAI, Z. D. & YIN, Y. Q. (1993). Limit of the smallest eigenvalue of a large-dimensional sample covariance matrix. *Ann. Probab.* **21**, 1275–1294. 160
- BHATIA, R. (1997). *Matrix Analysis*. Springer Verlag.
- HORN, R. & JOHNSON, C. (1990). *Matrix Analysis*. Cambridge Univ Pr.
- JOHN, S. (1971). Some optimal multivariate tests. *Biometrika* **58**, 123–127.
- JOHN, S. (1972). The distribution of a statistic used for testing sphericity of normal distributions. *Biometrika* **59**, 169–173. 165
- JUNG, S. & MARRON, J. S. (2009). PCA consistency in high dimension, low sample size context. *Ann. Statist.* **37**, 4104–4130.
- LEE, S., ZOU, F. & WRIGHT, F. (2010). Convergence and prediction of principal component scores in high-dimensional settings. *Ann. Statist.* **38**, 3605–3629.
- PAUL, D. (2007). Asymptotics of sample eigenstructure for a large dimensional spiked covariance model. *Statist. Sinica* **17**, 1617–1642. 170
- YIN, Y. Q., BAI, Z. D. & KRISHNAIAH, P. R. (1988). On the limit of the largest eigenvalue of the large-dimensional sample covariance matrix. *Probab. Theory Related Fields* **78**, 509–521.
